# Supplementary material for: Sodium Selenate, Potassium Hydroxy-Selenide, Acetylselenide and Their Effect on Antioxidant Metabolism and Plant Nutrition and Yield in Sorghum Genotypes
Source: MDPI journal article supplement (doi:10.3390/foods12102034), 2023-05-17
Supplement: s1 [file s1]

## Supplementary Material

**Table S1.** Summary of characteristics of eight sorghum cultivars.

| Cultivars  | RNC*  | PH<br>(cm) | SF<br>(days) | SH<br>(days) | Color<br>grain |
|------------|-------|------------|--------------|--------------|----------------|
| BM737      | 29344 | 135-145    | 51-55        | 120-130      | Red            |
| BRS310     | 18751 | 115        | 65           | 120          | Red            |
| Enforcer   | 30336 | 120-130    | 55-60        | 110-120      | Brown          |
| K200       | 38142 | 140-160    | UN           | UN           | Red            |
| Nugrain320 | 38145 | 130        | 58-60        | 110-115      | Orange         |
| Nugrain420 | 40315 | 150        | 65-70        | 125-130      | Orange         |
| Nugrain430 | 36743 | 140        | 65-70        | 125-130      | Orange         |
| SHS410     | 18772 | 125-135    | 48-52        | 120-130      | Red            |

UN – uninformed; PH – plant height; SF – sowing to flowering; SC – sowing to harvest. \*RNC- National Registry of cultivars. Details about patent and Maintainer of cultivar can be found at Brazil [73].

**Table S2.** Chemical characterization and particle size distribution before sowing of the soil used in the greenhouse-grown.

| Units |                                    | Method/<br>Extractant                                                                     | Greenhouse |
|-------|------------------------------------|-------------------------------------------------------------------------------------------|------------|
| Sand  | g kg <sup>-1</sup>                 | Hydrometer                                                                                | 730        |
| Silt  | g kg <sup>-1</sup>                 | Hydrometer                                                                                | 50         |
| Clay  | g kg <sup>-1</sup>                 | Hydrometer                                                                                | 220        |
| SOM   | g kg <sup>-1</sup>                 | Na <sub>2</sub> Cr <sub>2</sub> O <sub>7</sub> 4N +<br>H <sub>2</sub> SO <sub>4</sub> 10N | 6.8        |
| pH    |                                    | Water 1:2.5                                                                               | 5.1        |
| Al    | cmol <sub>c</sub> dm <sup>-3</sup> | KCl (1 mol L <sup>-1</sup> )                                                              | 0.45       |
| Al+H  | cmol <sub>c</sub> dm <sup>-3</sup> | SMP                                                                                       | 2.37       |
| P     | mg dm <sup>-3</sup>                | Mehlich-1                                                                                 | 0.71       |
| K     | mg dm <sup>-3</sup>                | Mehlich-1                                                                                 | 23.46      |
| Ca    | cmol <sub>c</sub> dm <sup>-3</sup> | KCl (1 mol L <sup>-1</sup> )                                                              | 0.19       |
| Mg    | cmol <sub>c</sub> dm <sup>-3</sup> | KCl (1 mol L <sup>-1</sup> )                                                              | 0.10       |
| S     | mg dm <sup>-3</sup>                | Ca(H <sub>2</sub> PO <sub>4</sub> ) <sub>2</sub> +<br>CH <sub>3</sub> COOH                | 4.23       |
| B     | mg dm <sup>-3</sup>                | Hot water                                                                                 | 0.07       |
| Cu    | mg dm <sup>-3</sup>                | Mehlich-1                                                                                 | 0.10       |
| Fe    | mg dm <sup>-3</sup>                | Mehlich-1                                                                                 | 47.33      |
| Mn    | mg dm <sup>-3</sup>                | Mehlich-1                                                                                 | 2.44       |
| Zn    | mg dm <sup>-3</sup>                | Mehlich-1                                                                                 | 0.28       |
| Se    | mg kg <sup>-1</sup>                | USEPA3051A                                                                                | <DL        |

SOM – soil organic matter; DL – detection limit.

**Table S3.** Lines used to determine the elements with ICP-OES and assessment of precision through the analysis of Peach Leaves SRM1547.

| Element or Nutrient | $\lambda$ (nm) | Certified <sup>a</sup> (mg kg <sup>-1</sup> ) | Found <sup>b</sup> (mg kg <sup>-1</sup> ) | % Recovery <sup>c</sup> |
|---------------------|----------------|-----------------------------------------------|-------------------------------------------|-------------------------|
| S                   | 180.731        | 2000                                          | 1566±501                                  | 78                      |
| P                   | 178.287        | 1371±82                                       | 1343±43                                   | 98                      |
| K                   | 769.896        | 24330±380                                     | 25584±528                                 | 105                     |
| Ca                  | 315.887        | 15590±160                                     | 16948±501                                 | 109                     |
| Mg                  | 279.079        | 4320±150                                      | 4586±139                                  | 106                     |
| Fe                  | 373.486        | 219.8±6.8                                     | 214±10,9                                  | 97                      |
| Cu                  | 324.754        | 3.75±0.37                                     | 2.70±0.22                                 | 72                      |
| Zn                  | 213.856        | 17.97±0.53                                    | 17.3±0.96                                 | 96                      |
| Mn                  | 403.076        | 97.8±1.8                                      | 113±2.39                                  | 116                     |

<sup>a</sup> Results for Peach Leaves SRM1547 represented as mean ± confidence interval, informative value. <sup>b</sup> Mean ± standard error of the mean. Average of ten determinations. <sup>c</sup> Average of ten determinations.

**Table S4.** Analysis of variance of eight sorghum cultivars cultivated in greenhouse and in field conditions, fertilized with different Se sources.

| Source of variation           | F-test |    |     |       |
|-------------------------------|--------|----|-----|-------|
|                               | C      | S  | CxS | CV    |
| H <sub>2</sub> O <sub>2</sub> | *      | ns | **  | 16.63 |
| MDA                           | **     | ** | **  | 13.14 |
| SOD                           | **     | *  | *   | 12.21 |
| CAT                           | **     | ** | **  | 16.69 |
| APX                           | **     | ** | **  | 15.53 |
| Protein                       | **     | *  | **  | 14.90 |
| SeC-Gr                        | **     | ** | **  | 19.57 |
| SeC-Sh                        | **     | ** | **  | 14.33 |
| SeU                           | **     | ** | **  | 23.46 |
| SeAE                          | **     | ** | **  | 23.75 |
| Grain yield                   | **     | ** | **  | 8.21  |
| Grain Weight                  | **     | ns | ns  | 15.69 |
| NC-Gr                         | **     | *  | **  | 3.45  |
| SC-Gr                         | **     | ** | **  | 4.91  |
| PC-Gr                         | **     | ** | **  | 11.57 |
| KC-Gr                         | **     | ns | *   | 12.85 |
| CaC-Gr                        | **     | ** | **  | 16.45 |
| MgC-Gr                        | **     | ** | **  | 12.53 |
| FeC-Gr                        | **     | ** | *   | 13.52 |
| ZnC-Gr                        | **     | ** | *   | 13.02 |
| CuC-Gr                        | **     | ** | **  | 12.47 |
| MnC-Gr                        | **     | *  | *   | 12.10 |
| NC-Sh                         | **     | ** | *   | 10.85 |
| SC-Sh                         | **     | ns | **  | 13.60 |
| PC-Sh                         | **     | ** | **  | 18.55 |
| KC-Sh                         | **     | ** | **  | 8.12  |
| CaC-Sh                        | **     | *  | **  | 9.79  |
| MgC-Sh                        | **     | *  | *   | 10.77 |
| FeC-Sh                        | **     | ** | **  | 7.52  |
| ZnC-Sh                        | **     | ** | **  | 9.88  |
| CuC-Sh                        | **     | ** | **  | 12.38 |
| MnC-Sh                        | **     | ns | ns  | 11.31 |

ns – not significant by F-test; \* - significant by F-test at p<0,05; \*\* - significant by F-test at p<0,01;

CV – coefficient of variation (%).

Degrees of freedom, greenhouse: cultivars (C) – 7; doses (D) – 3; C x D – 21; residue – 96

Abbreviations: Se content in grain (SeC-Gr) and in shoot (SeC-Sh); Se absorption efficiency (SeAE); Se uptake (SeU); lipid peroxidation (MDA); hydrogen peroxide (H<sub>2</sub>O<sub>2</sub>); catalase (CAT); ascorbate peroxidase (APX), superoxide dismutase (SOD); N (NC-Gr), S (SC-Gr), P (PC-Gr), K (KC-Gr), Mg (MgC-Gr), Fe (FeC-Gr), Zn (ZnC-Gr), Mn (MnC-Gr), Cu (CuC-Gr) content in the grain; N (NC-Sh), S (SC-Sh), P (PC-Sh), K (KC-Sh), Mg (MgC-Sh), Ca (CaC-Sh); Fe (FeC-Sh); Zn (ZnC-Sh), Mn (MnC-Sh) and Cu (CuC-Sh) content in the shoot.
